# Supplementary material for: Dose approach matter? A meta-analysis of outcomes following transfemoral versus transapical transcatheter aortic valve replacement
Source: Springer Nature journal article supplement (doi:10.1186/s12872-021-02158-4), 2021-07-28
Supplement: MOESM1 [file 19399920]

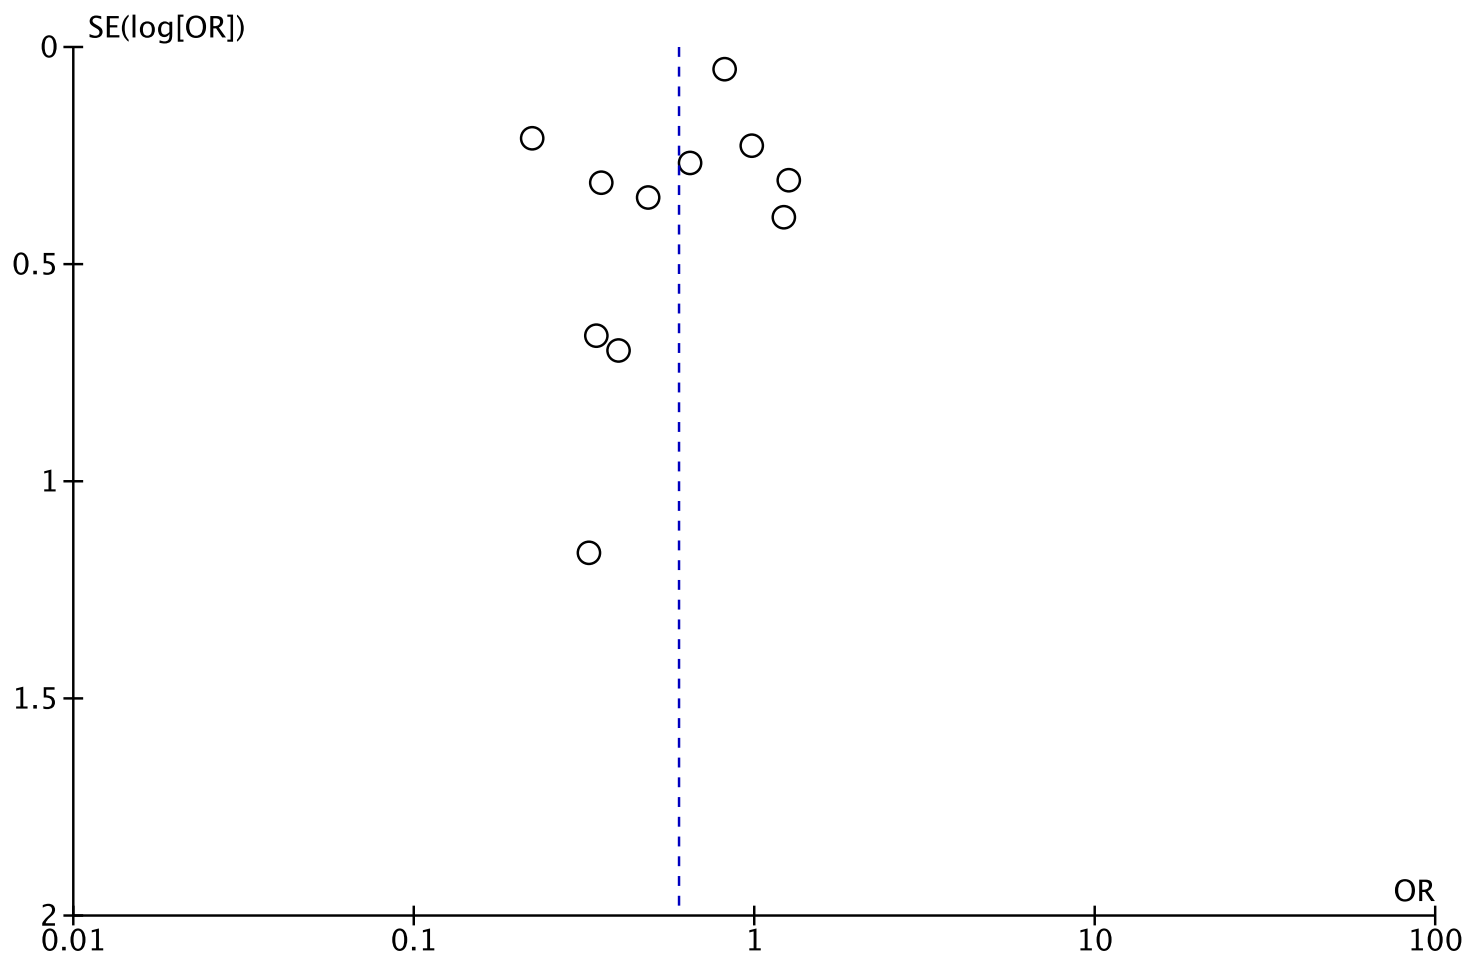

Funnel plot of comparison meta-analysis outcomes between TF-TAVR versus TA-TAVR: (A) Major bleeding events

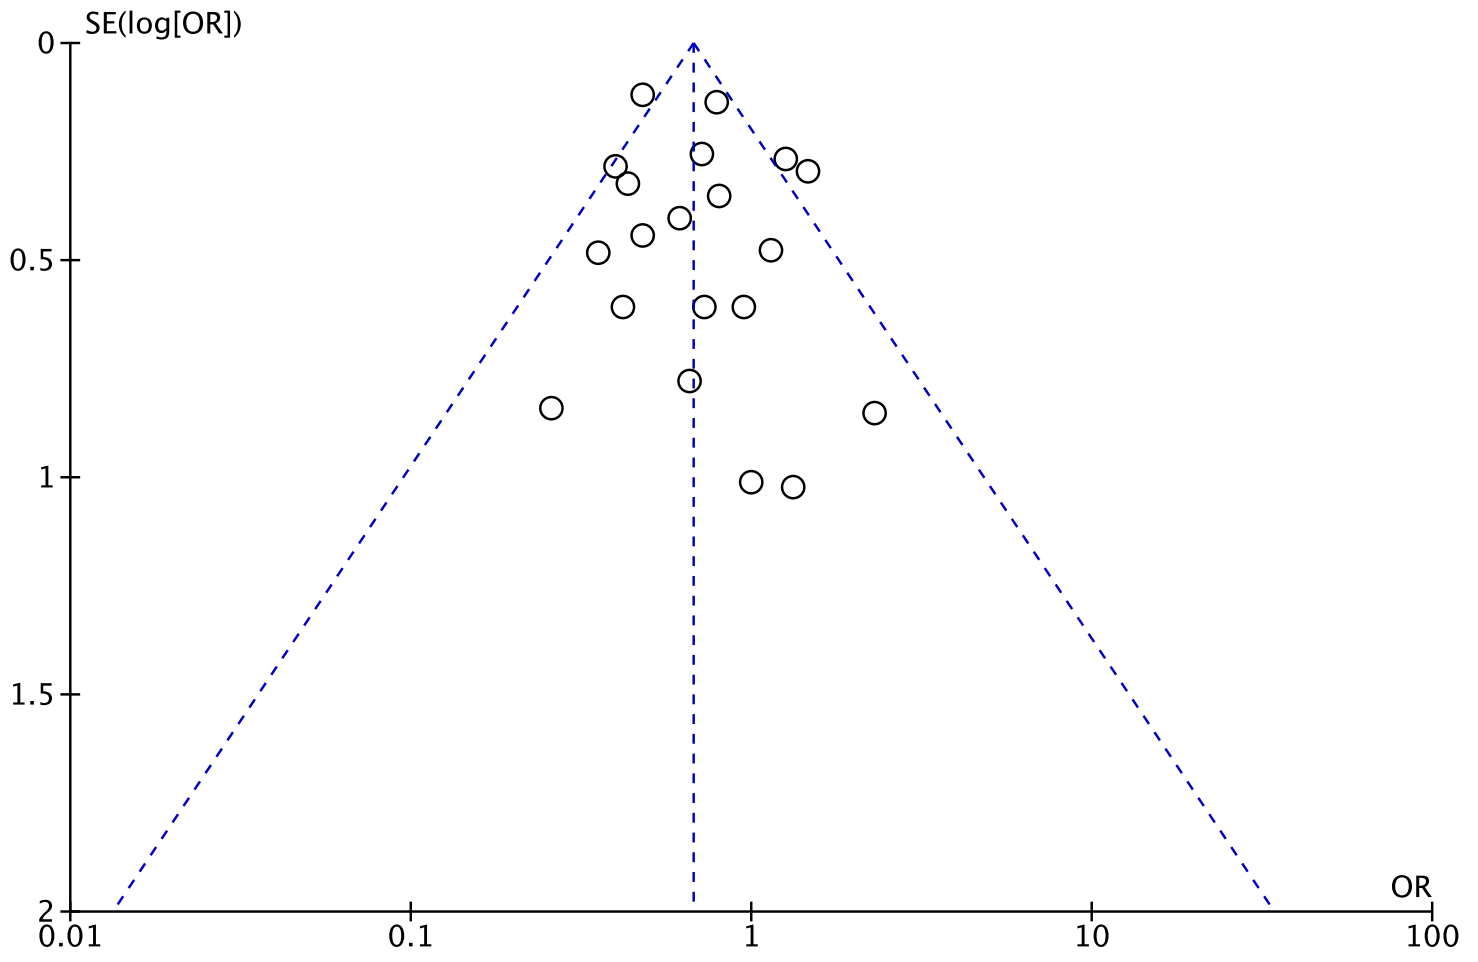

Funnel plot of comparison meta-analysis outcomes between TF-TAVR versus TA-TAVR: (B) 30-day mortality

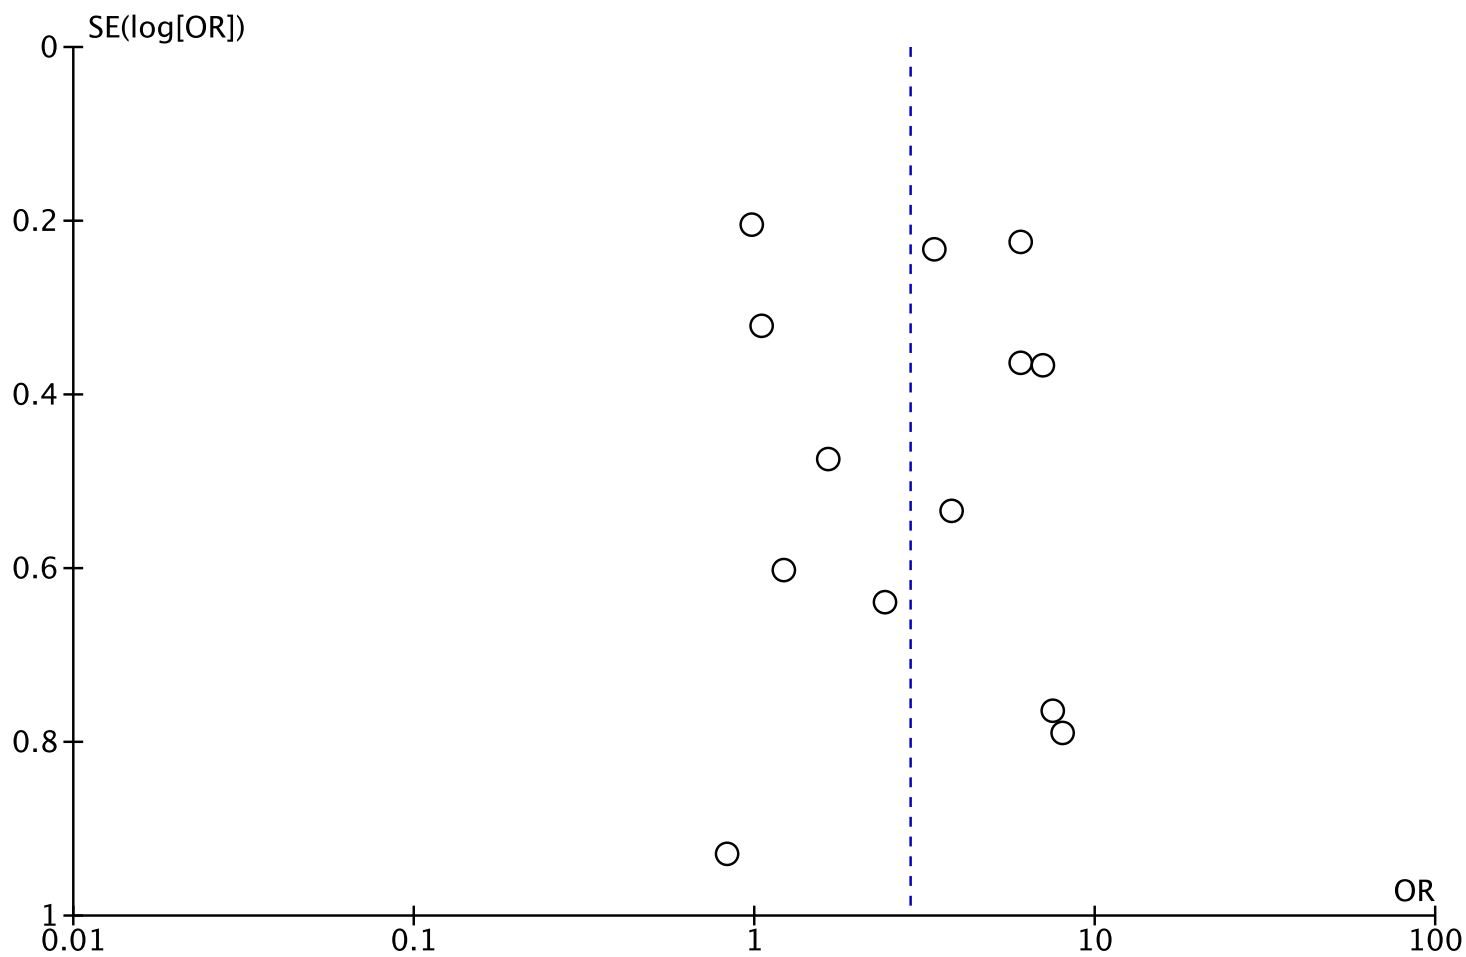

Funnel plot of comparison meta-analysis outcomes between TF-TAVR versus TA-TAVR: (C) Major vascular complications

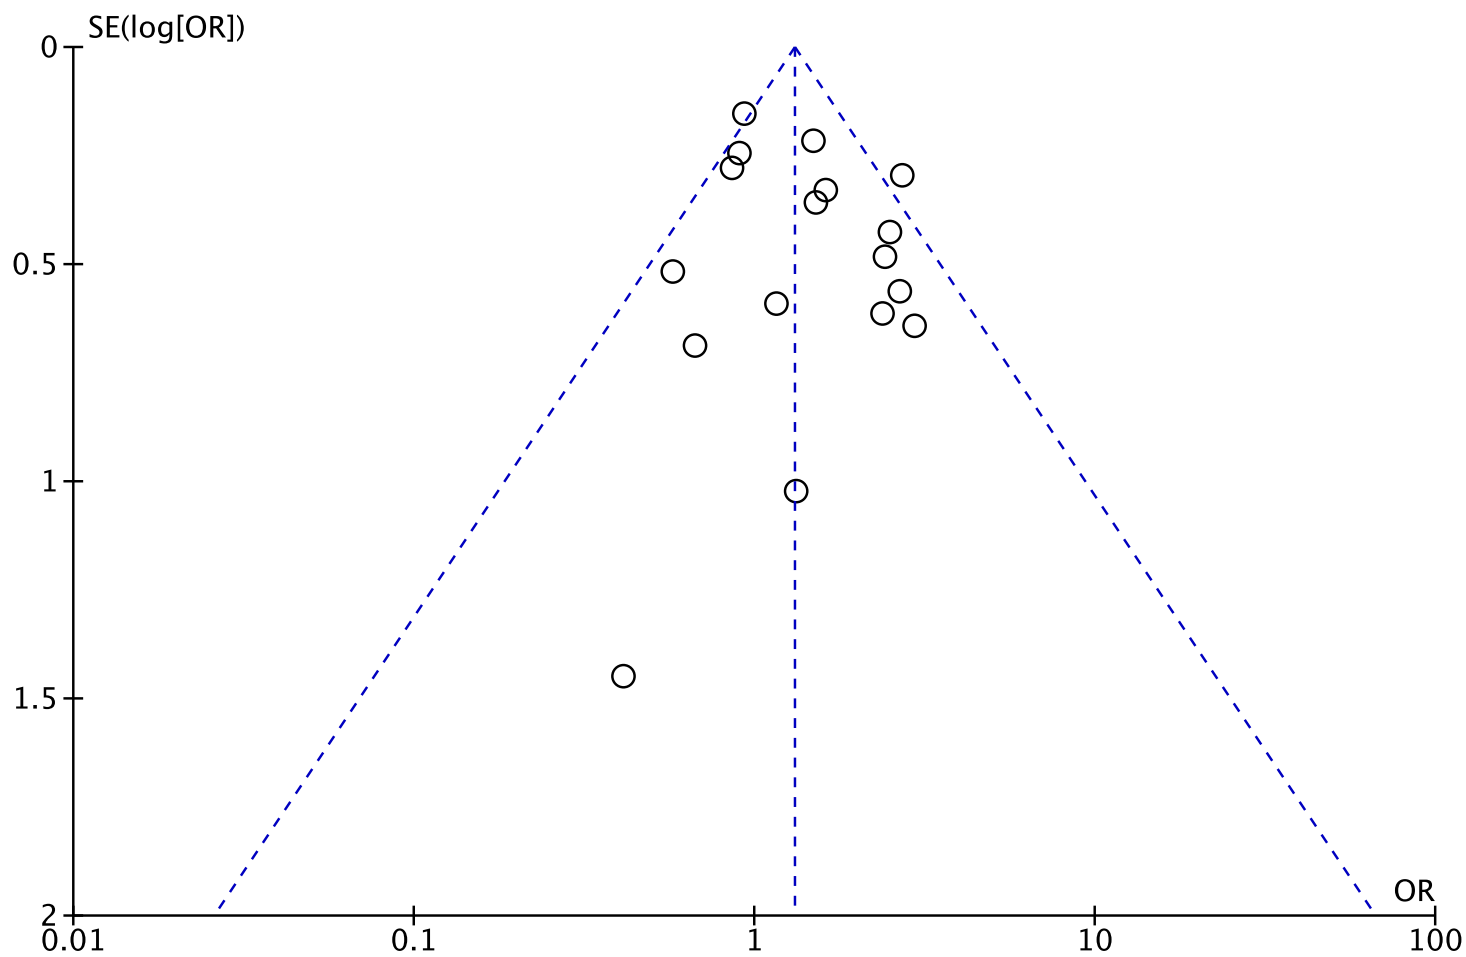

Funnel plot of comparison meta-analysis outcomes between TF-TAVR versus TA-TAVR: (D) Pacemaker implantation

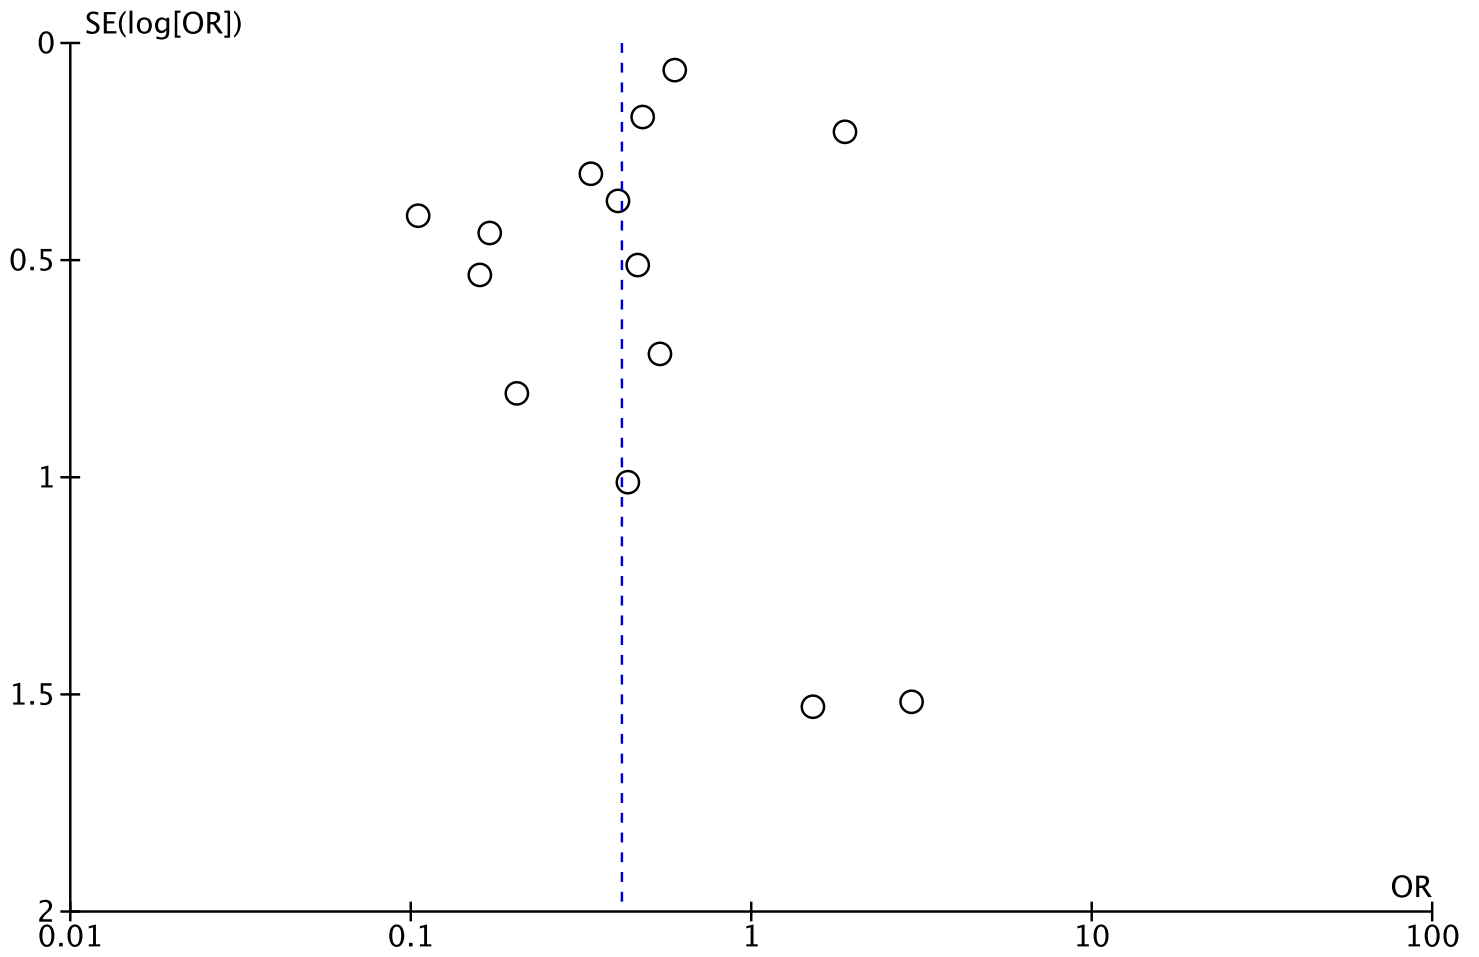

Funnel plot of comparison meta-analysis outcomes between TF-TAVR versus TA-TAVR: (E) Acute kidney injury

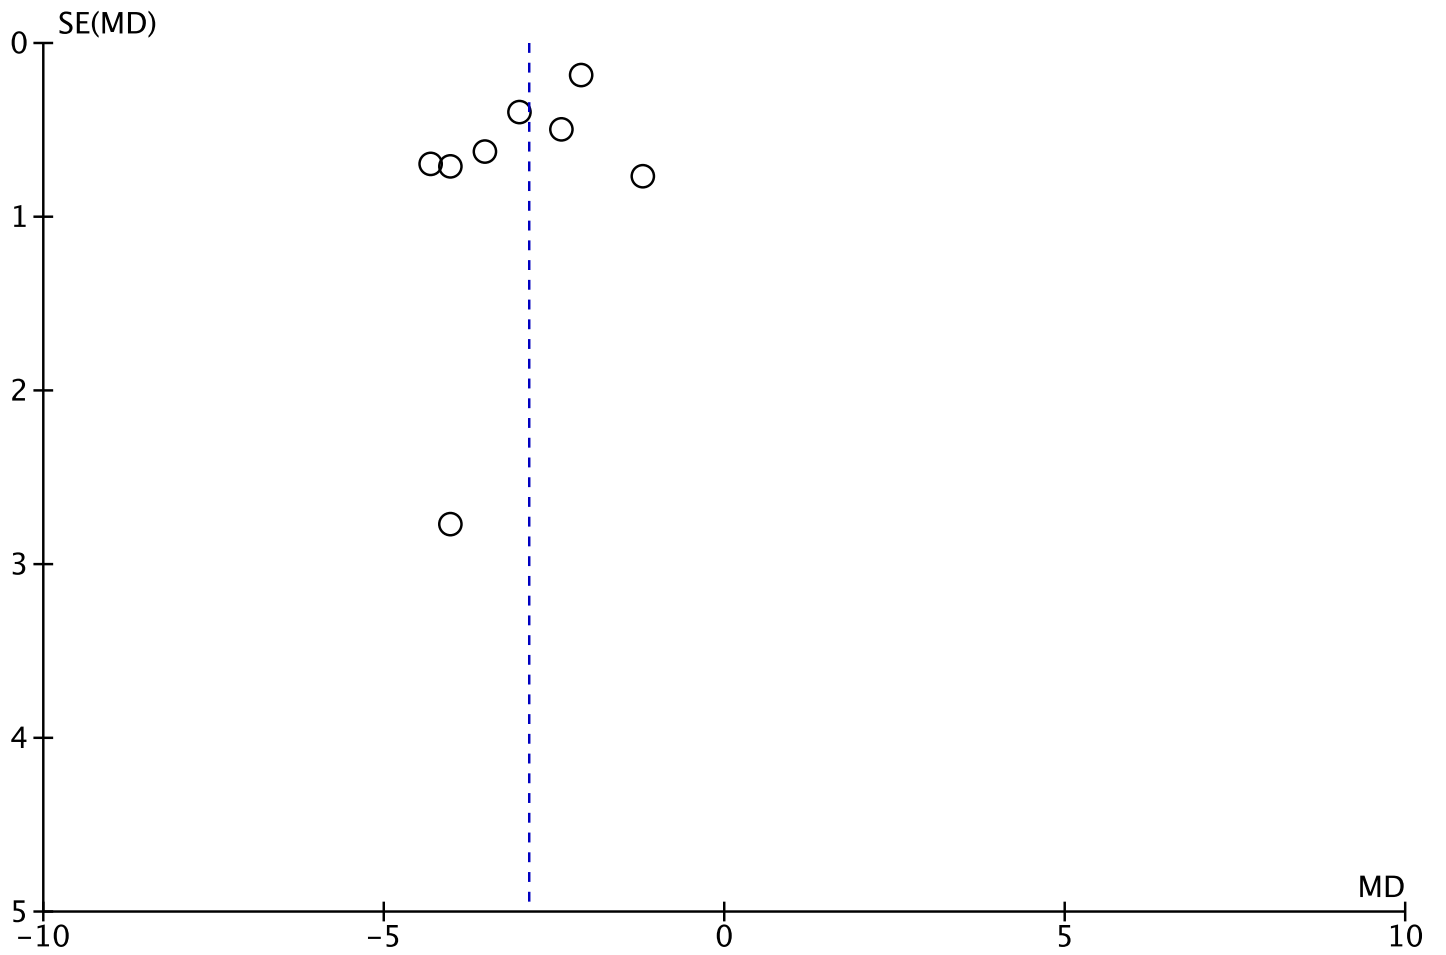

Funnel plot of comparison meta-analysis outcomes between TF-TAVR versus TA-TAVR: (F) Length of hospital stay

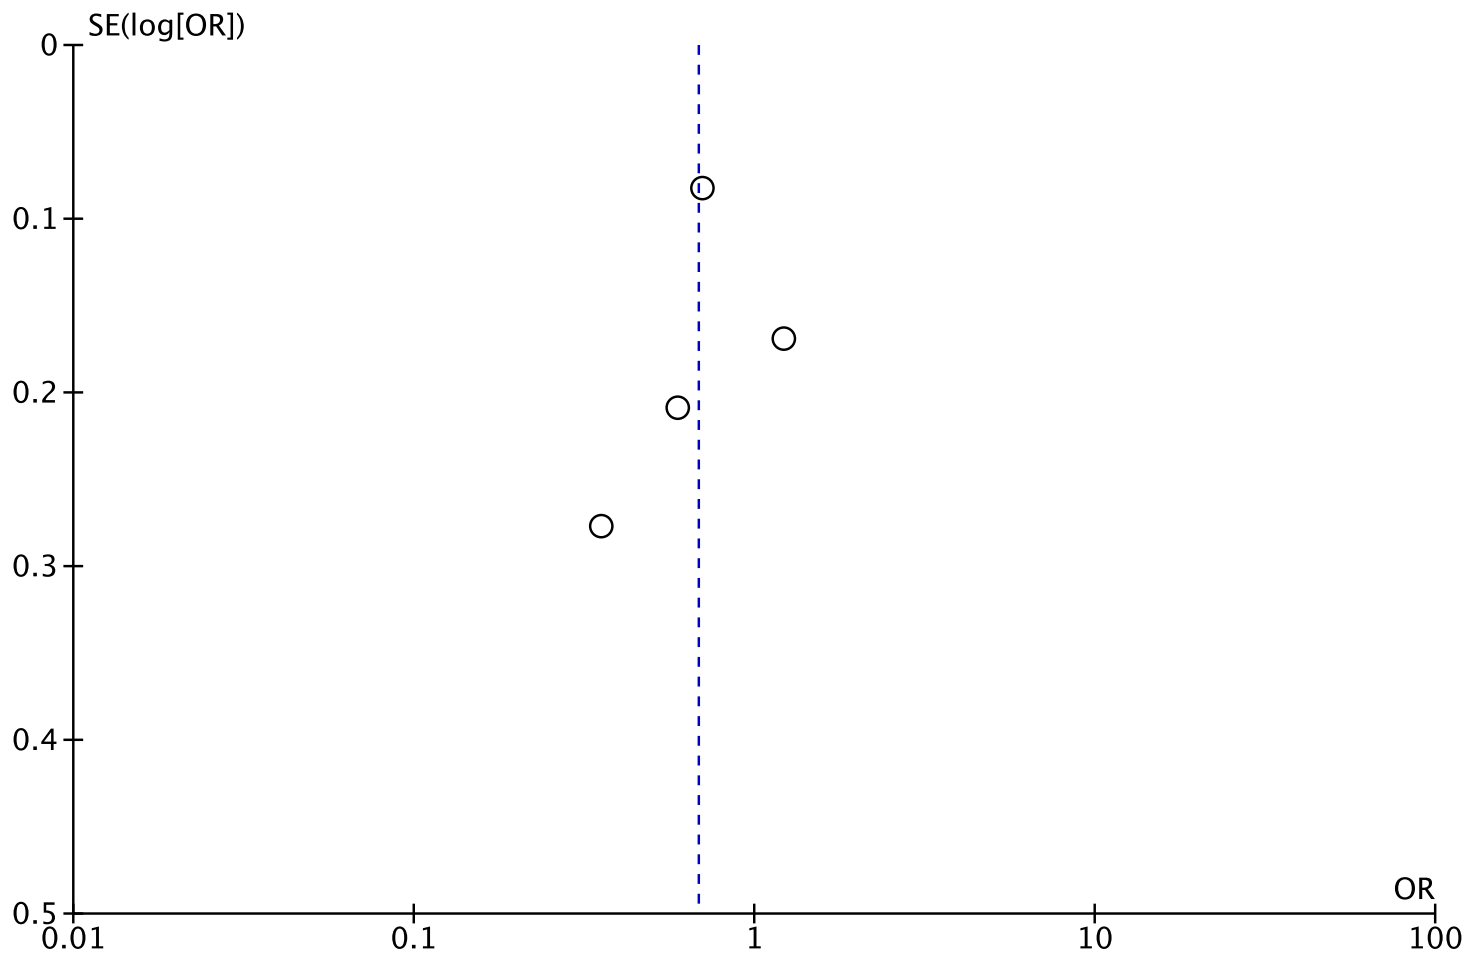

Funnel plot of comparison meta-analysis outcomes between TF-TAVR versus TA-TAVR: (G)Mid-term mortality

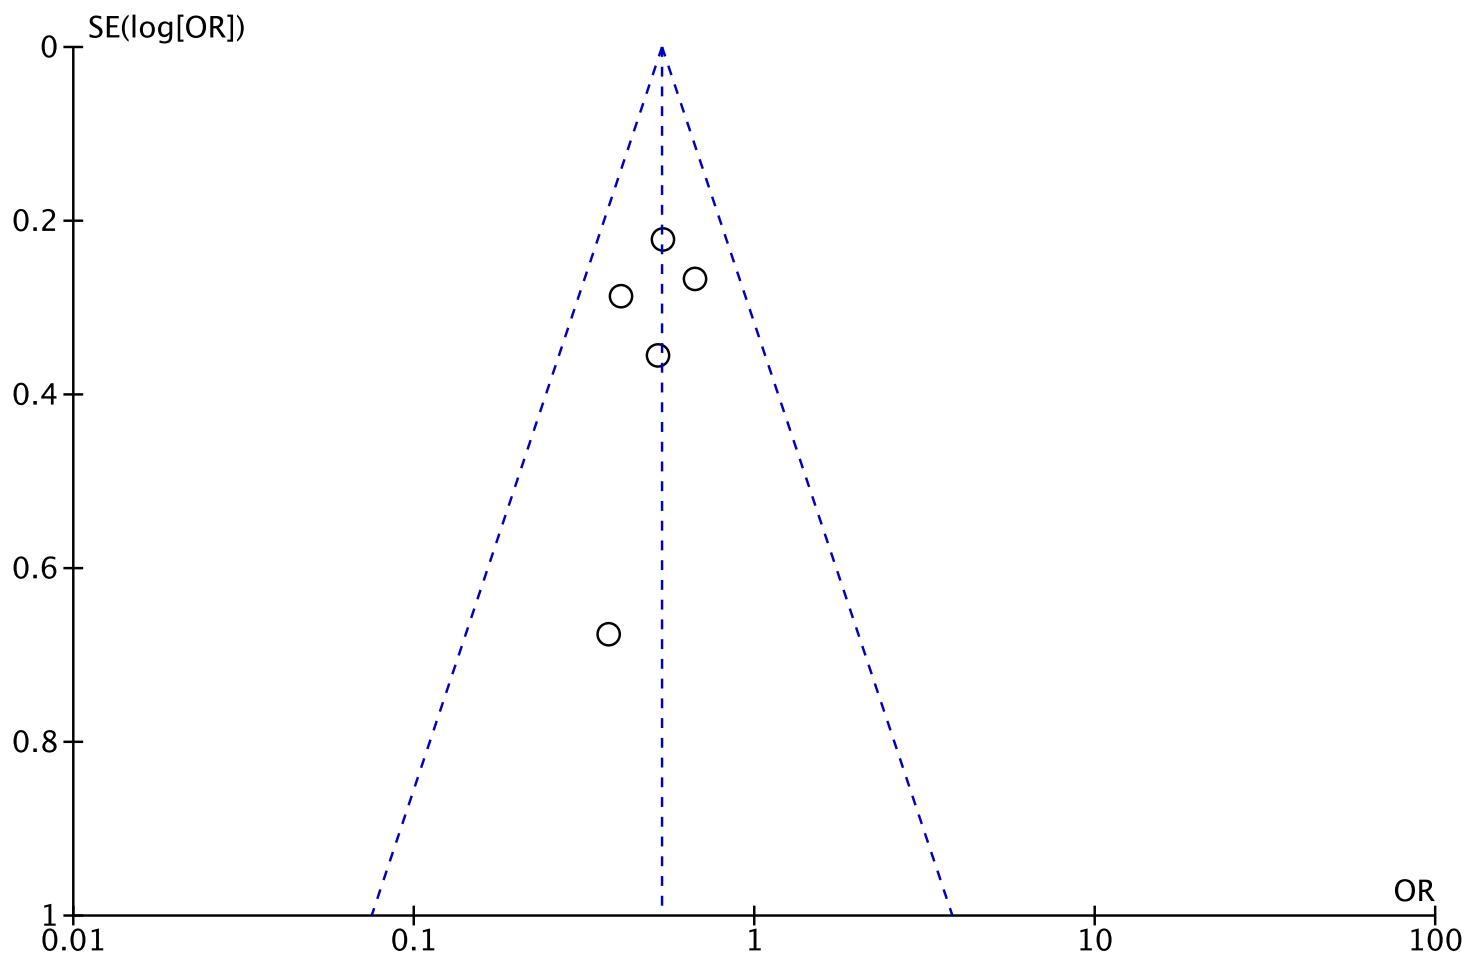

Funnel plot of comparison meta-analysis outcomes between TF-TAVR versus TA-TAVR: (H) 1-year mortality



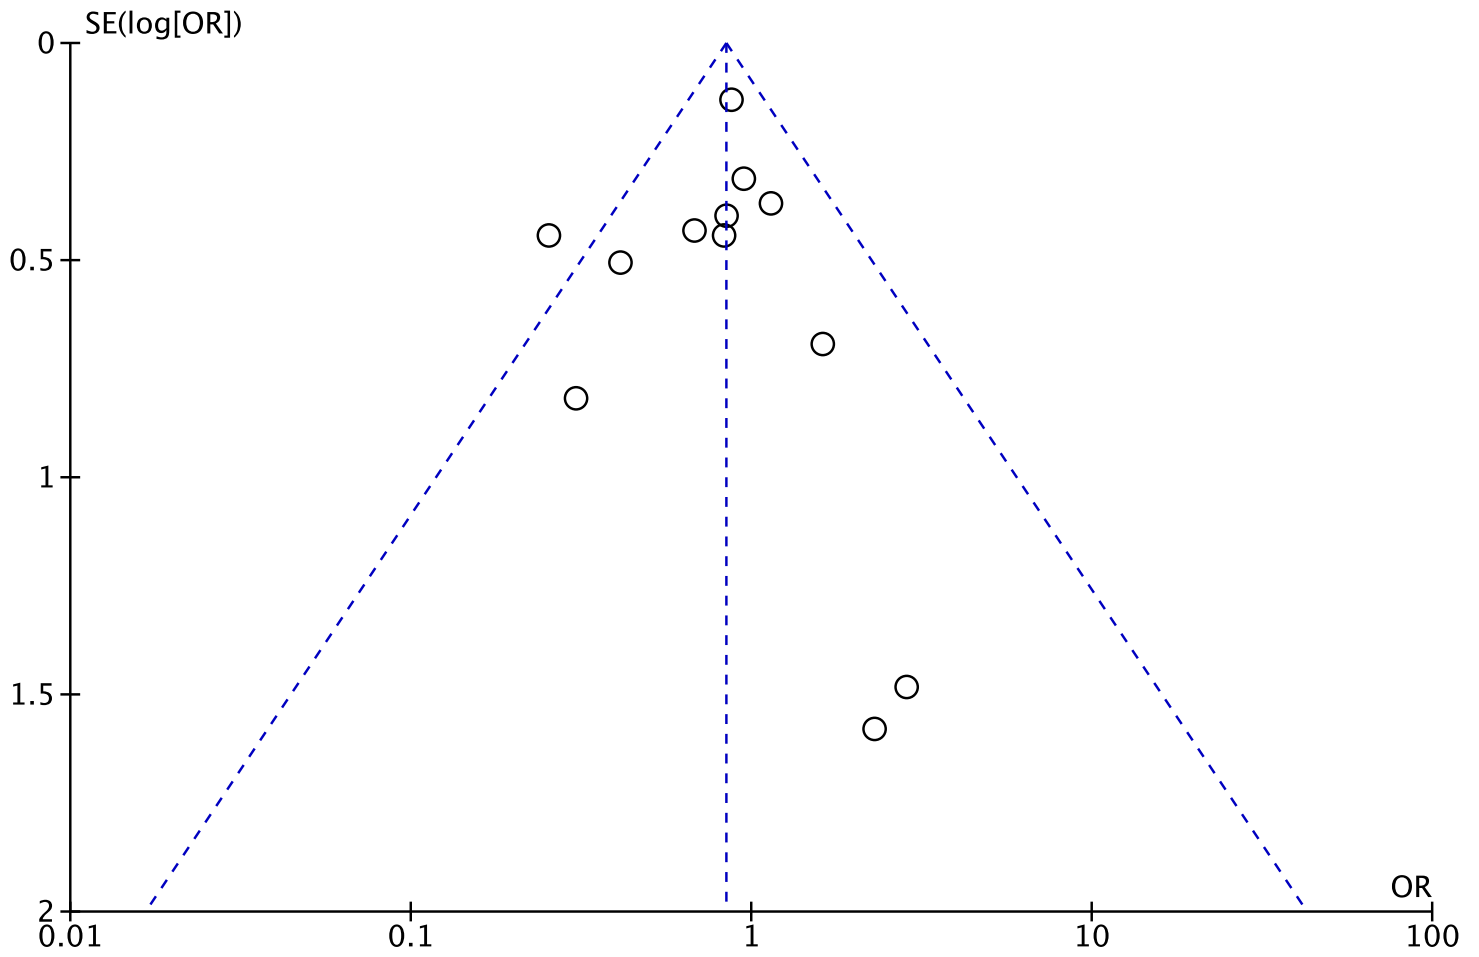

Funnel plot of comparison meta-analysis outcomes between TF-TAVR versus TA-TAVR: (I)Stroke
